# Supplementary material
Source: publisher site journal article supplement (https://www.dovepress.com/article/294905)
Supplement: Supplementary file 1 [file get_supplementary_file.php]

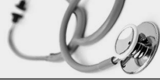

## **Introduction and Consent to Participate**

**Intensive Care Units (ICU's) are multidisciplinary complex work environment. Efficient work flow in such areas depends on all team members' knowledge and skills, including their successful integration of new technologies in managing the critically ill patients. This technology could be either a new model of a previous medical device (like new ventilator, a new vital signs monitors, infusion and injection pumps...), or a totally new device that the ICU Staff never used before.**

**This survey aims to assess the level of awareness of the ICU Staff about their technical role when using new medical devices in the ICU, what factors affect their satisfaction with such new technologies, and their knowledge about the role of the technical staff (Biomedical Engineers and Technicians) in maintaining the safety of the medical devices operation.**

**You are invited to participate in this survey if you meet all of the following Inclusion Criteria:**

- Healthcare provider (nurse, physician, respiratory therapist ...)**
- Working in KSUMC for 6 months or more**
- Work mainly in patients' care in acute care areas (ICUs, Emergency Department, OR)**

**Your participation is voluntary, and you can choose to be totally anonymous, and as recognition for your valuable time, you can participate in a Lucky Draw for Jarir Coupons,**

**Thank you in advance for your valuable input, and if you have any question or comments, you can contact the Primary Investigator at [dr.fahad.alsohime@gmail.com](mailto:dr.fahad.alsohime@gmail.com)**

**With our Best Regards,  
Dr Fahad Al-Sohime  
Dr Hani Temsah  
Critical Care - KSUMC**

**Eng Omar Alsohime  
SFDA**

Consent to participate:

- I am a KSUMC Healthcare Provider (Nurse, Physician, RT...) working mainly in Acute Care area (ICU, ER, OR) AND Agree to participate
- I do NOT accept to participate



The Data Resulting From this survey WILL BE CONSIDERED Anonymous

Discipline/Area

What is your role in the ICU:

What is your gender?

Female

Male

For how long you have been working in the ICU?

1-2 years

3-5 years

6-10 years

More than 10 years

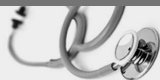

Please answer the following from your actual practice:

Are you aware of the PPM (Periodic Preventative Maintenance) for medical devices in your ICU?

Yes

No

Who performs PPM in your ICU?

- Nurses
- Physicians
- Biomedical Engineering
- Vendors (Company)
- Other (please specify)

**\* On a Scale from 1 to 5, can you determine your level of comfort in dealing with the following devices in the ICU?**

(1: not at all comfortable to 5: completely comfortable)

|                            | 1                     | 2                     | 3                     | 4                     | 5                     |
|----------------------------|-----------------------|-----------------------|-----------------------|-----------------------|-----------------------|
| Infusion Pumps             | <input type="radio"/> |
| Mechanical Ventilator      | <input type="radio"/> |
| Non Invasive BP monitoring | <input type="radio"/> |
| pulse oxymeter             | <input type="radio"/> |
| ECG                        | <input type="radio"/> |
| Defibrillator              | <input type="radio"/> |

**Regarding the Following Medical Devices, Can you determine:**

|                                   | Did you receive formal training to this device | Is there a super user for this device | Is the user manual reachable | How do you learn more about the device |
|-----------------------------------|------------------------------------------------|---------------------------------------|------------------------------|----------------------------------------|
| Infusion Pump "Volumat MC Agilia" | <input type="text"/>                           | <input type="text"/>                  | <input type="text"/>         | <input type="text"/>                   |
| Mechanical Ventilator "Servo i"   | <input type="text"/>                           | <input type="text"/>                  | <input type="text"/>         | <input type="text"/>                   |
| Cardiac Monitor "Carescape"       | <input type="text"/>                           | <input type="text"/>                  | <input type="text"/>         | <input type="text"/>                   |
| ECG "Mac 5500"                    | <input type="text"/>                           | <input type="text"/>                  | <input type="text"/>         | <input type="text"/>                   |
| Defibrillator "Heart Stream XL"   | <input type="text"/>                           | <input type="text"/>                  | <input type="text"/>         | <input type="text"/>                   |

**In the past year, Have you ever faced a Technical problem with any of the previously mentioned machines such as User Error, device malfunction or sudden shut down of the machine**

- Yes
- No

**\* When there is an alarm from one of the medical devices, how do you trouble shoot these issues?**

Arrange your approach steps according to the priority from 1 to 6.

|   |                      |                                      |
|---|----------------------|--------------------------------------|
| ⋮ | <input type="text"/> | I Respond to it appropriately        |
| ⋮ | <input type="text"/> | Contact the super user or the senior |
| ⋮ | <input type="text"/> | Call the Biomed technician           |
| ⋮ | <input type="text"/> | Call the company                     |
| ⋮ | <input type="text"/> | I turn it off                        |
| ⋮ | <input type="text"/> | Other                                |

**In your center .The following procedure regarding medical devices, are performed by whom?**

|                                  | Nurse                 | Head Nurse            | Super user            | Physician             | Biomed Technician     | The manufacture       |
|----------------------------------|-----------------------|-----------------------|-----------------------|-----------------------|-----------------------|-----------------------|
| Equipment assembling             | <input type="radio"/> |
| Trouble shooting                 | <input type="radio"/> |
| Oerder Supply                    | <input type="radio"/> |
| Maintenance & device calibration | <input type="radio"/> |
| Sterilization                    | <input type="radio"/> |
| Disposals                        | <input type="radio"/> |

**\* How do you get update regarding the potential adverse events of different medical devices ?**

- Manufacture,
- Ministry of health,
- Public advertisement,
- SFDA,
- Medical Literature
- Colleagues
- Other (please specify)

**If an adverse event related to a medical devices, Are you aware about any official national reporting system regarding these events?**

- Yes
- No

**EVER BETTER**  
OUR COMMITMENT TO ADVANCING THE PATIENT EXPERIENCE

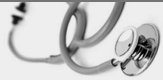

**Factors Affecting ICU Staff Satisfaction with New Technologies in Critical Care Units**

**Troubleshooting / reporting**

**If Yes, What is the organization that you will report to?  
(Choose all that apply)**

- Ministry of health
- Saudi Council for Health Specialities
- Saudi Food and drug organization
- The council of cooperative health insurance
- CBAHI
- Other (please specify)

**How do you report these Adverse events?  
(You can choose more than one answer)**

- Website
- Email
- Phone
- Fax
- Other (please specify)

**Have you ever reported an adverse event to this system?**

- Yes
- No



Copy of page: **The Data Resulting From this survey**

**If yes, did you receive feedback regarding your report?**

Yes

No

**How much were you satisfied with feedback you received? Why?**

Not satisfied

Minimal satisfaction

Mildly satisfied

Satisfied

Extremely satisfied

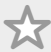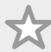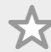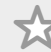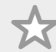

Reason for your answer above:

**Optional: If you want to join our Lucky Draw for Jarir Coupons, please provide your email:**
